# Supplementary material for: An Arabidopsis introgression zone studied at high spatio-temporal resolution: interglacial and multiple genetic contact exemplified using whole nuclear and plastid genomes
Source: PubMed Central journal article supplement (PMC5651623; doi:10.1186/s12864-017-4220-6), 2017-10-23
Supplement: 12864_2017_4220_MOESM7_ESM.pdf [file 12864_2017_4220_MOESM7_ESM.pdf]

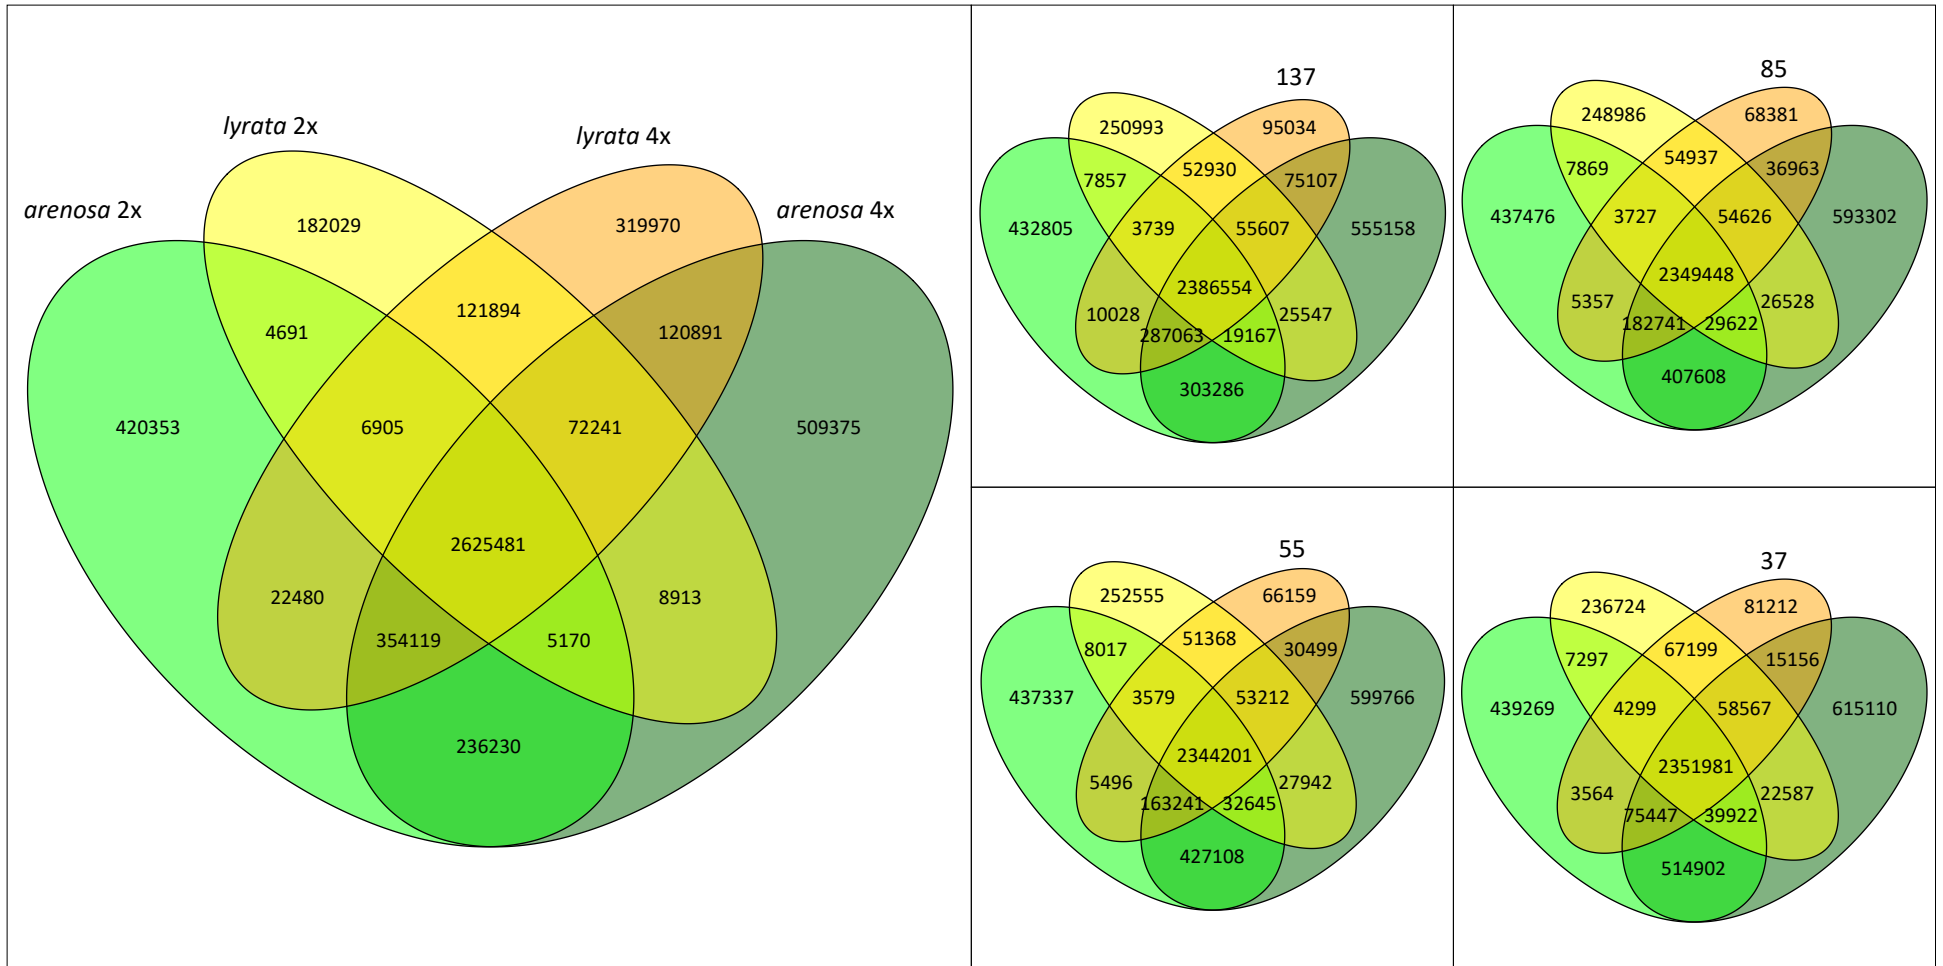

Additional File 7.
